# Supplementary material for: Rikkosan’s Short-Term Analgesic Effect on Burning Mouth Syndrome: A Single-Arm Cohort Study
Source: MDPI journal article supplement (doi:10.3390/biomedicines12051013), 2024-05-04
Supplement: s1 [file s1]

Table S1. Pain scores and treatment periods.

| ID | Pre | Post | Treatment periods | The duration of pain complaint | Under treatment with other medications |
|----|-----|------|-------------------|--------------------------------|----------------------------------------|
| 1  | 5   | 5    | 32                | <2 years                       | Yes                                    |
| 2  | 6   | 5    | 22                | <10 years                      | Yes                                    |
| 3  | 5   | 3    | 31                | <10 years                      | Yes                                    |
| 4  | 5   | 2    | 19                | 4–5 years                      | Yes                                    |
| 5  | 6   | 2    | 19                | 1–2 years                      | Yes                                    |
| 6  | 10  | 3    | 36                | 4 years                        | Yes                                    |
| 7  | 4   | 4    | 35                | 1 years                        | Yes                                    |
| 8  | 5   | 4    | 43                | 5 months                       | Yes                                    |
| 9  | 7   | 3    | 32                | 5 months                       | Yes                                    |
| 10 | 7   | 3    | 34                | 1 year                         | Yes                                    |
| 11 | 10  | 8    | 33                | 2 years                        | Yes                                    |
| 12 | 9   | 8    | 20                | 1 year                         | Yes                                    |
| 13 | 2.5 | 1    | 35                | 1 year                         | Yes                                    |
| 14 | 4.5 | 1.5  | 21                | 4 months                       | Yes                                    |
| 15 | 3   | 2.5  | 29                | 4 months                       | Yes                                    |
| 16 | 3   | 3    | 28                | 6 months                       | Yes                                    |
| 17 | 6   | 4.5  | 28                | 3 months                       | No                                     |
| 18 | 7   | 6.5  | 30                | 1.5 years                      | Yes                                    |
| 19 | 10  | 6    | 35                | 1.5 years                      | Yes                                    |
| 20 | 2   | 0    | 28                | 3 months                       | No                                     |
